# Supplementary material for: HIV RNA measurement in dried blood spots of HIV-infected patients in Thailand using Abbott m2000 system
Source: PubMed Central journal article supplement (PMC6980635; doi:10.1371/journal.pone.0227929), 2020-01-24
Supplement: pone.0227929.s001.pdf [file pone.0227929.s001.pdf]

| Site | Identification | Gender | Age  | ART-experienced | ART type | Regimen         | Plasma HIV VL log | DBS HIV VL log |
|------|----------------|--------|------|-----------------|----------|-----------------|-------------------|----------------|
| 05   | VLD001         | Male   | 18   | No              |          |                 | 6.01              | 5.55           |
| 05   | VLD002         | Male   | 24.1 | No              |          |                 | 5.74              | 5.40           |
| 05   | VLD003         | Male   | 37.5 | No              |          |                 | 5.44              | 5.34           |
| 05   | VLD004         | Female | 47.6 | No              |          |                 | 5.68              | 5.44           |
| 05   | VLD005         | Female | 33.4 | No              |          |                 | 4.22              | 4.08           |
| 05   | VLD006         | Male   | 52   | No              |          |                 | 5.20              | 4.96           |
| 05   | VLD007         | Male   | 22.3 | No              |          |                 | 3.51              | 2.86           |
| 05   | VLD008         | Male   | 39.5 | No              |          |                 | 5.09              | 4.72           |
| 05   | VLD009         | Male   | 28.1 | No              |          |                 | 6.05              | 5.88           |
| 05   | VLD010         | Male   | 44.6 | No              |          |                 | 5.22              | 4.90           |
| 05   | VLD011         | Male   | 23.1 | No              |          |                 | 5.46              | 5.15           |
| 05   | VLD012         | Male   | 36.8 | No              |          |                 | 5.49              | 5.20           |
| 05   | VLD013         | Male   | 24.5 | No              |          |                 | 5.30              | 4.91           |
| 05   | VLD014         | Male   | 48.1 | No              |          |                 | 3.71              | 2.91           |
| 05   | VLD015         | Female | 32.8 | Yes             | PMTCT    | AZT             | 5.42              | 5.54           |
| 05   | VLD016         | Male   | 22   | No              |          |                 | 4.44              | 4.21           |
| 05   | VLD017         | Male   | 24.8 | No              |          |                 | 4.95              | 4.97           |
| 05   | VLD018         | Male   | 21.2 | No              |          |                 | 4.59              | 4.40           |
| 05   | VLD019         | Male   | 29.9 | No              |          |                 | 5.68              | 5.53           |
| 05   | VLD020         | Male   | 62.8 | No              |          |                 | 2.18              | 1.30           |
| 05   | VLD021         | Male   | 50.1 | No              |          |                 | 5.14              | 4.67           |
| 05   | VLD022         | Male   | 33   | No              |          |                 | 5.32              | 5.00           |
| 35   | VLD031         | Male   | 35.2 | No              |          |                 | 6.28              | 5.97           |
| 35   | VLD032         | Male   | 57.5 | No              |          |                 | 5.72              | 5.41           |
| 35   | VLD033         | Male   | 51.3 | No              |          |                 | 4.89              | 4.41           |
| 35   | VLD034         | Female | 40.1 | Yes             | PMTCT    | not available   | 4.61              | 4.42           |
| 35   | VLD035         | Female | 42.2 | No              |          |                 | 4.29              | 3.92           |
| 35   | VLD042         | Male   | 47.7 | No              |          |                 | 4.91              | 4.95           |
| 35   | VLD043         | Male   | 45.5 | No              |          |                 | 5.98              | 5.61           |
| 35   | VLD044         | Female | 32.8 | No              |          |                 | 5.14              | 4.89           |
| 35   | VLD045         | Male   | 32.1 | No              |          |                 | 5.94              | 5.69           |
| 35   | VLD046         | Female | 43.2 | No              |          |                 | 5.59              | 5.25           |
| 35   | VLD047         | Male   | 28.1 | No              |          |                 | 4.52              | 4.13           |
| 35   | VLD048         | Male   | 21.6 | No              |          |                 | 5.33              | 5.02           |
| 35   | VLD049         | Female | 35.5 | No              |          |                 | 4.96              | 4.70           |
| 35   | VLD050         | Male   | 34.7 | No              |          |                 | 3.92              | 3.86           |
| 47   | VLD051         | Male   | 22   | No              |          |                 | 4.42              | 3.82           |
| 47   | VLD052         | Male   | 29   | No              |          |                 | 3.41              | 3.53           |
| 47   | VLD053         | Male   | 40.4 | No              |          |                 | 5.49              | 5.23           |
| 47   | VLD054         | Male   | 18.1 | No              |          |                 | 5.75              | 5.38           |
| 47   | VLD055         | Male   | 20.4 | No              |          |                 | 4.67              | 4.40           |
| 47   | VLD056         | Male   | 34.6 | No              |          |                 | 4.28              | 4.29           |
| 47   | VLD057         | Male   | 24.1 | No              |          |                 | 4.97              | 4.69           |
| 47   | VLD058         | Male   | 21.1 | No              |          |                 | 4.65              | 4.51           |
| 47   | VLD059         | Male   | 19.5 | No              |          |                 | 1.30              | 1.30           |
| 47   | VLD060         | Male   | 18.2 | No              |          |                 | 4.45              | 3.89           |
| 47   | VLD061         | Female | 28.1 | Yes             | PMTCT    | COMBID + LPV/RT | 2.98              | 1.30           |
| 47   | VLD062         | Male   | 22.4 | Yes             | PMTCT    | COMBID + LPV/RT | 4.45              | 4.58           |
| 47   | VLD063         | Female | 35.4 | No              |          |                 | 5.63              | 6.10           |

|    |        |        |      |    |  |  |      |      |
|----|--------|--------|------|----|--|--|------|------|
| 47 | VLD064 | Female | 37.3 | No |  |  | 5.20 | 5.46 |
| 47 | VLD065 | Male   | 34   | No |  |  | 4.05 | 4.13 |
| 47 | VLD066 | Male   | 50.3 | No |  |  | 4.71 | 3.66 |
| 47 | VLD067 | Female | 43.3 | No |  |  | 3.70 | 3.73 |
| 47 | VLD068 | Male   | 52.8 | No |  |  | 6.79 | 6.72 |
| 47 | VLD069 | Male   | 52.5 | No |  |  | 4.11 | 3.81 |
| 47 | VLD070 | Male   | 23.5 | No |  |  | 5.10 | 3.92 |
| 47 | VLD071 | Female | 19.5 | No |  |  | 4.79 | 4.55 |
| 47 | VLD072 | Male   | 22.6 | No |  |  | 4.90 | 4.87 |
| 47 | VLD073 | Male   | 36.6 | No |  |  | 5.68 | 5.40 |
| 47 | VLD074 | Female | 34.6 | No |  |  | 5.36 | 5.24 |
| 47 | VLD075 | Female | 46.6 | No |  |  | 6.65 | 6.53 |
| 47 | VLD076 | Male   | 18.6 | No |  |  | 4.35 | 4.29 |
| 47 | VLD078 | Male   | 24.8 | No |  |  | 4.40 | 4.13 |
| 47 | VLD079 | Female | 31.6 | No |  |  | 4.31 | 4.26 |
| 47 | VLD080 | Male   | 54   | No |  |  | 5.66 | 5.43 |
| 47 | VLD081 | Female | 69.7 | No |  |  | 4.36 | 3.99 |
| 47 | VLD089 | Male   | 35.7 | No |  |  | 4.95 | 4.66 |
| 47 | VLD090 | Male   | 26.7 | No |  |  | 4.15 | 3.98 |
| 47 | VLD091 | Male   | 50.3 | No |  |  | 5.92 | 5.61 |
| 47 | VLD092 | Male   | 18.1 | No |  |  | 4.88 | 4.70 |
| 47 | VLD093 | Male   | 22.8 | No |  |  | 5.21 | 5.08 |
| 47 | VLD094 | Male   | 31   | No |  |  | 5.01 | 4.71 |
| 47 | VLD095 | Male   | 25.4 | No |  |  | 5.26 | 4.93 |
| 47 | VLD096 | Male   | 29.6 | No |  |  | 5.46 | 5.59 |
| 35 | VLD101 | Female | 34.2 | No |  |  | 2.60 | 3.22 |
| 35 | VLD102 | Male   | 43.3 | No |  |  | 5.65 | 5.36 |
| 35 | VLD103 | Male   | 24.6 | No |  |  | 4.63 | 4.43 |
| 35 | VLD104 | Male   | 35.9 | No |  |  | 6.31 | 5.98 |
| 35 | VLD105 | Female | 40.8 | No |  |  | 5.95 | 5.58 |
| 35 | VLD106 | Female | 36.7 | No |  |  | 5.62 | 5.32 |
